# Supplementary material
Source: PubMed Central journal article supplement (PMC2505187)
Supplement: NIHMS58487-supplement-8.pdf [file NIHMS58487-supplement-8.pdf]

Synthesis, Characterization, and Preliminary  
Oxygenation Studies of Benzyl- and Ethyl-  
Substituted Pyridine Ligands of Carboxylate-Rich  
Diiron(II) Complexes

*Emily C. Carson and Stephen J. Lippard\**

Massachusetts Institute of Technology, Cambridge, MA 02139

RECEIVED DATE August 00, 2005

**Table S1.** Summary of X-ray Crystallographic Data

|                                       | <b>2</b>                                                                                       | <b>3·C<sub>4</sub>H<sub>10</sub>O</b>                                           | <b>5</b>                                                                       |
|---------------------------------------|------------------------------------------------------------------------------------------------|---------------------------------------------------------------------------------|--------------------------------------------------------------------------------|
| Empirical Formula                     | Fe <sub>2</sub> C <sub>108</sub> H <sub>88</sub> N <sub>2</sub> O <sub>8</sub> Cl <sub>2</sub> | Fe <sub>2</sub> C <sub>106</sub> H <sub>112</sub> N <sub>2</sub> O <sub>9</sub> | Fe <sub>2</sub> C <sub>110</sub> H <sub>94</sub> N <sub>2</sub> O <sub>8</sub> |
| Formula Weight                        | 1724.40                                                                                        | 1729.64                                                                         | 1683.57                                                                        |
| Space Group                           | Pbca                                                                                           | P1̄                                                                             | P2 <sub>1</sub> /c                                                             |
| a, Å                                  | 13.751(3)                                                                                      | 14.516(3)                                                                       | 13.774(3)                                                                      |
| b, Å                                  | 23.133(5)                                                                                      | 17.236(4)                                                                       | 23.088(5)                                                                      |
| c, Å                                  | 27.455(6)                                                                                      | 20.031(5)                                                                       | 14.488(3)                                                                      |
| α, deg                                |                                                                                                | 115.140(3)                                                                      |                                                                                |
| β, deg                                |                                                                                                | 91.959(4)                                                                       | 107.498(4)                                                                     |
| γ, deg                                |                                                                                                | 93.572(4)                                                                       |                                                                                |
| V, Å <sup>3</sup>                     | 8734(3)                                                                                        | 4517.8(18)                                                                      | 4394.4(15)                                                                     |
| Z                                     | 4                                                                                              | 2                                                                               | 2                                                                              |
| ρ <sub>calc</sub> , g/cm <sup>3</sup> | 1.311                                                                                          | 1.271                                                                           | 1.272                                                                          |
| T, °C                                 | -100                                                                                           | -100                                                                            | -100                                                                           |
| μ(Mo Kα), mm <sup>-1</sup>            | 0.455                                                                                          | 0.383                                                                           | 0.392                                                                          |
| θ limits, deg                         | 1.88 – 27.50                                                                                   | 1.74 – 26.37                                                                    | 1.78 – 26.38                                                                   |
| total no. of data                     | 72872                                                                                          | 36881                                                                           | 28010                                                                          |
| no. of unique data                    | 9955                                                                                           | 18153                                                                           | 7686                                                                           |
| no. of params                         | 554                                                                                            | 1134                                                                            | 550                                                                            |
| Goodness-of-fit on F <sup>2</sup>     | 1.320                                                                                          | 1.029                                                                           | 1.029                                                                          |
| R1 <sup>a</sup>                       | 0.0738                                                                                         | 0.0423                                                                          | 0.0634                                                                         |
| wR <sup>2b</sup>                      | 0.1684                                                                                         | 0.1096                                                                          | 0.1191                                                                         |
| max, min peaks, e/Å <sup>3</sup>      | 0.731, -0.493                                                                                  | 0.688, -0.358                                                                   | 0.357, -0.313                                                                  |

$$^a R1 = \frac{\sum ||F_o| - F_c||}{\sum |F_o|}. \quad ^b wR^2 = \left\{ \frac{\sum [w(F_o^2 - F_c^2)^2]}{\sum [w(F_o^2)^2]} \right\}^{1/2}.$$

Table S1. Continued

|                                          | <b>6</b> ·2.5CH <sub>2</sub> Cl <sub>2</sub>                                                   | <b>7</b>                                                                      | <b>8</b>                                                                      | <b>9</b>                                                                                     |
|------------------------------------------|------------------------------------------------------------------------------------------------|-------------------------------------------------------------------------------|-------------------------------------------------------------------------------|----------------------------------------------------------------------------------------------|
| Empirical Formula                        | Fe <sub>2</sub> C <sub>101</sub> H <sub>92</sub> N <sub>2</sub> O <sub>8</sub> Cl <sub>5</sub> | Fe <sub>2</sub> C <sub>98</sub> H <sub>86</sub> N <sub>2</sub> O <sub>8</sub> | Fe <sub>2</sub> C <sub>98</sub> H <sub>86</sub> N <sub>2</sub> O <sub>8</sub> | Fe <sub>2</sub> C <sub>90</sub> H <sub>62</sub> N <sub>2</sub> O <sub>8</sub> F <sub>8</sub> |
| Formula Weight                           | 1750.72                                                                                        | 1531.39                                                                       | 1531.39                                                                       | 1563.12                                                                                      |
| Space Group                              | P2 <sub>1</sub> /c                                                                             | P $\bar{1}$                                                                   | P2 <sub>1</sub> /c                                                            | P $\bar{1}$                                                                                  |
| a, Å                                     | 15.219(2)                                                                                      | 12.311(3)                                                                     | 10.775(3)                                                                     | 12.2612(16)                                                                                  |
| b, Å                                     | 10.8186(16)                                                                                    | 13.322(3)                                                                     | 24.890(8)                                                                     | 13.3582(17)                                                                                  |
| c, Å                                     | 29.434(4)                                                                                      | 14.608(3)                                                                     | 15.118(5)                                                                     | 23.981(3)                                                                                    |
| $\alpha$ , deg                           |                                                                                                | 115.544(3)                                                                    |                                                                               | 84.355(2)                                                                                    |
| $\beta$ , deg                            | 117.387(6)                                                                                     | 108.042(4)                                                                    | 106.178(6)                                                                    | 86.811(2)                                                                                    |
| $\gamma$ , deg                           |                                                                                                | 98.087(4)                                                                     |                                                                               | 67.916(2)                                                                                    |
| V, Å <sup>3</sup>                        | 4303.1(10)                                                                                     | 1947.5(8)                                                                     | 3894(2)                                                                       | 3621.2(8)                                                                                    |
| Z                                        | 2                                                                                              | 1                                                                             | 2                                                                             | 2                                                                                            |
| $\rho_{\text{calc}}$ , g/cm <sup>3</sup> | 1.351                                                                                          | 1.306                                                                         | 1.306                                                                         | 1.434                                                                                        |
| T, °C                                    | -100                                                                                           | -100                                                                          | -100                                                                          | -100                                                                                         |
| $\mu$ (Mo K $\alpha$ ), mm <sup>-1</sup> | 0.553                                                                                          | 0.434                                                                         | 0.434                                                                         | 0.484                                                                                        |
| $\theta$ limits, deg                     | 2.04 – 26.38                                                                                   | 1.74 – 26.37                                                                  | 1.62 – 26.39                                                                  | 1.65 – 26.37                                                                                 |
| total no. of data                        | 34613                                                                                          | 16083                                                                         | 31640                                                                         | 29709                                                                                        |
| no. of unique data                       | 8807                                                                                           | 7841                                                                          | 7957                                                                          | 14571                                                                                        |
| no. of params                            | 583                                                                                            | 500                                                                           | 500                                                                           | 991                                                                                          |
| Goodness-of-fit on F <sup>2</sup>        | 1.206                                                                                          | 1.224                                                                         | 1.314                                                                         | 1.061                                                                                        |
| R1 <sup>a</sup>                          | 0.0894                                                                                         | 0.0533                                                                        | 0.0734                                                                        | 0.0552                                                                                       |
| wR <sup>2b</sup>                         | 0.1886                                                                                         | 0.1317                                                                        | 0.1467                                                                        | 0.1237                                                                                       |
| max, min peaks, e/Å <sup>3</sup>         | 0.952, -0.664                                                                                  | 0.865, -0.225                                                                 | 1.058, -0.497                                                                 | 0.495, -0.324                                                                                |

$${}^a\text{R1} = \Sigma||F_o| - F_c| / \Sigma|F_o|. \quad {}^b\text{wR}^2 = \{ \Sigma[w(F_o^2 - F_c^2)^2] / \Sigma[w(F_o^2)^2] \}^{1/2}.$$

**Table S2.** A Comparison of Fe $\cdots$ Fe and Fe–O Distances in Carboxylate-Bridged Diiron(II) Windmill Structures with Their Coordination Number.

|                | Coordination<br>Number | Fe $\cdots$ Fe | Fe–O <sub>av</sub> | Fe–O <sub>L</sub> |
|----------------|------------------------|----------------|--------------------|-------------------|
| <b>1</b> (Fe1) | 4                      | 4.2380(9)      | 1.999(2)           | 2.463(2)          |
| <b>1</b> (Fe2) | 5                      | 4.6052(9)      | 2.033(2)           | 2.281(2)          |
| <b>2</b>       | 5                      | 4.3908(11)     | 2.013(2)           | 2.308(2)          |
| <b>5</b>       | 5                      | 4.0656(10)     | 2.016(3)           | 2.214(2)          |
| <b>6</b>       | 4                      | 4.3361(12)     | 1.998(3)           | 2.517(3)          |
| <b>7</b>       | 4                      | 4.0861(10)     | 1.9714(17)         | 2.715(2)          |
| <b>8</b>       | 5                      | 4.1542(14)     | 2.068(3)           | 2.323(3)          |
| <b>9</b> (Fe1) | 5                      | 4.4830(10)     | 2.025(2)           | 2.225(2)          |
| <b>9</b> (Fe2) | 5                      | 4.4434(10)     | 2.002(2)           | 2.330(2)          |

### Captions for Supporting Figures

**Figure S1.** Top: ORTEP drawing of  $[\text{Fe}_2(\mu\text{-O}_2\text{CAr}^{\text{Tol}})_2(\text{O}_2\text{CAr}^{\text{Tol}})_2(2\text{-Bnpy})_2]$  (**1**) illustrating 50% probability thermal ellipsoids for all non-hydrogen atoms. Bottom: Drawing in which the aromatic rings of the  $\text{O}_2\text{CAr}^{\text{Tol}}$  ligands are omitted for clarity.

**Figure S2.** Top: ORTEP drawing of  $[\text{Fe}_2(\mu\text{-O}_2\text{CAr}^{\text{Tol}})_2(\text{O}_2\text{CAr}^{\text{Tol}})_2(2\text{-(4-ClBn)py})_2]$  (**2**) illustrating 50% probability thermal ellipsoids for all non-hydrogen atoms. Bottom: Drawing in which the aromatic rings of the  $\text{O}_2\text{CAr}^{\text{Tol}}$  ligands are omitted for clarity.

**Figure S3.** Top: ORTEP drawing of  $[\text{Fe}_2(\mu\text{-O}_2\text{CAr}^{\text{Tol}})_4(4\text{-Bnpy})_2]$  (**3**) illustrating 50% probability thermal ellipsoids for all non-hydrogen atoms. Bottom: Drawing in which the aromatic rings of the  $\text{O}_2\text{CAr}^{\text{Tol}}$  ligands are omitted for clarity.

**Figure S4.** Top: ORTEP drawing of  $[\text{Fe}_2(\mu\text{-O}_2\text{CAr}^{\text{Tol}})_2(\text{O}_2\text{CAr}^{\text{Tol}})_2(2\text{-Bnan})_2]$  (**5**) illustrating 50% probability thermal ellipsoids for all non-hydrogen atoms. Bottom: Drawing in which the aromatic rings of the  $\text{O}_2\text{CAr}^{\text{Tol}}$  ligands are omitted for clarity.

**Figure S5.** Top: ORTEP drawing of  $[\text{Fe}_2(\mu\text{-O}_2\text{CAr}^{\text{Tol}})_2(\text{O}_2\text{CAr}^{\text{Tol}})_2(2\text{-Etpy})_2]$  (**6**) illustrating 50% probability thermal ellipsoids for all non-hydrogen atoms. Bottom: Drawing in which the aromatic rings of the  $\text{O}_2\text{CAr}^{\text{Tol}}$  ligands are omitted for clarity.

**Figure S6.** Top: ORTEP drawing of  $[\text{Fe}_2(\mu\text{-O}_2\text{CAr}^{\text{Tol}})_2(\text{O}_2\text{CAr}^{\text{Tol}})_2(3\text{-Etpy})_2]$  (**7**) illustrating 50% probability thermal ellipsoids for all non-hydrogen atoms. Bottom: Drawing in which the aromatic rings of the  $\text{O}_2\text{CAr}^{\text{Tol}}$  ligands are omitted for clarity.

**Figure S7.** Top: ORTEP drawing of  $[\text{Fe}_2(\mu\text{-O}_2\text{CAr}^{\text{Tol}})_2(\text{O}_2\text{CAr}^{\text{Tol}})_2(4\text{-Etpy})_2]$  (**8**) illustrating 50% probability thermal ellipsoids for all non-hydrogen atoms. Bottom: Drawing in which the aromatic rings of the  $\text{O}_2\text{CAr}^{\text{Tol}}$  ligands are omitted for clarity.

**Figure S8.** Top: ORTEP drawing of  $[\text{Fe}_2(\mu\text{-O}_2\text{CAr}^{4\text{-FPh}})_2(\text{O}_2\text{CAr}^{4\text{-FPh}})_2(2\text{-Etpy})_2]$  (**9**) illustrating 50% probability thermal ellipsoids for all non-hydrogen atoms. Bottom: Drawing in which the aromatic rings of the  $\text{O}_2\text{CAr}^{4\text{-FPh}}$  ligands are omitted for clarity.

**Figure S9.** Mössbauer spectrum (experimental data ()), calculated (–) recorded at 4.2 K for solid sample of  $[\text{Fe}_2(\mu\text{-O}_2\text{CAr}^{\text{Tol}})_2(\text{O}_2\text{CAr}^{\text{Tol}})_2(2\text{-Bnpy})_2]$  (**1**).

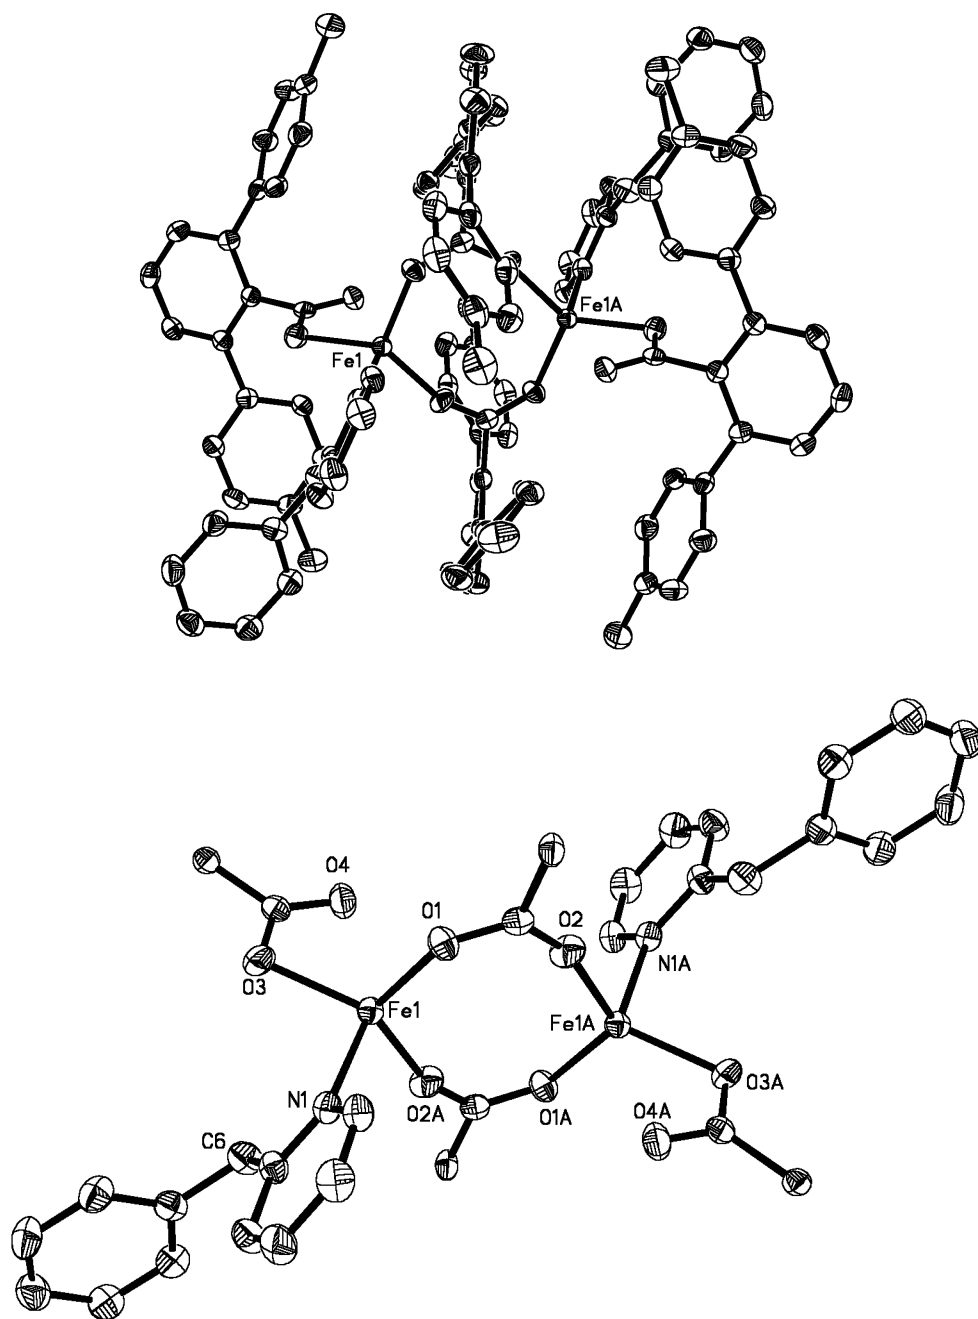

**Figure S1.** Carson and Lippard

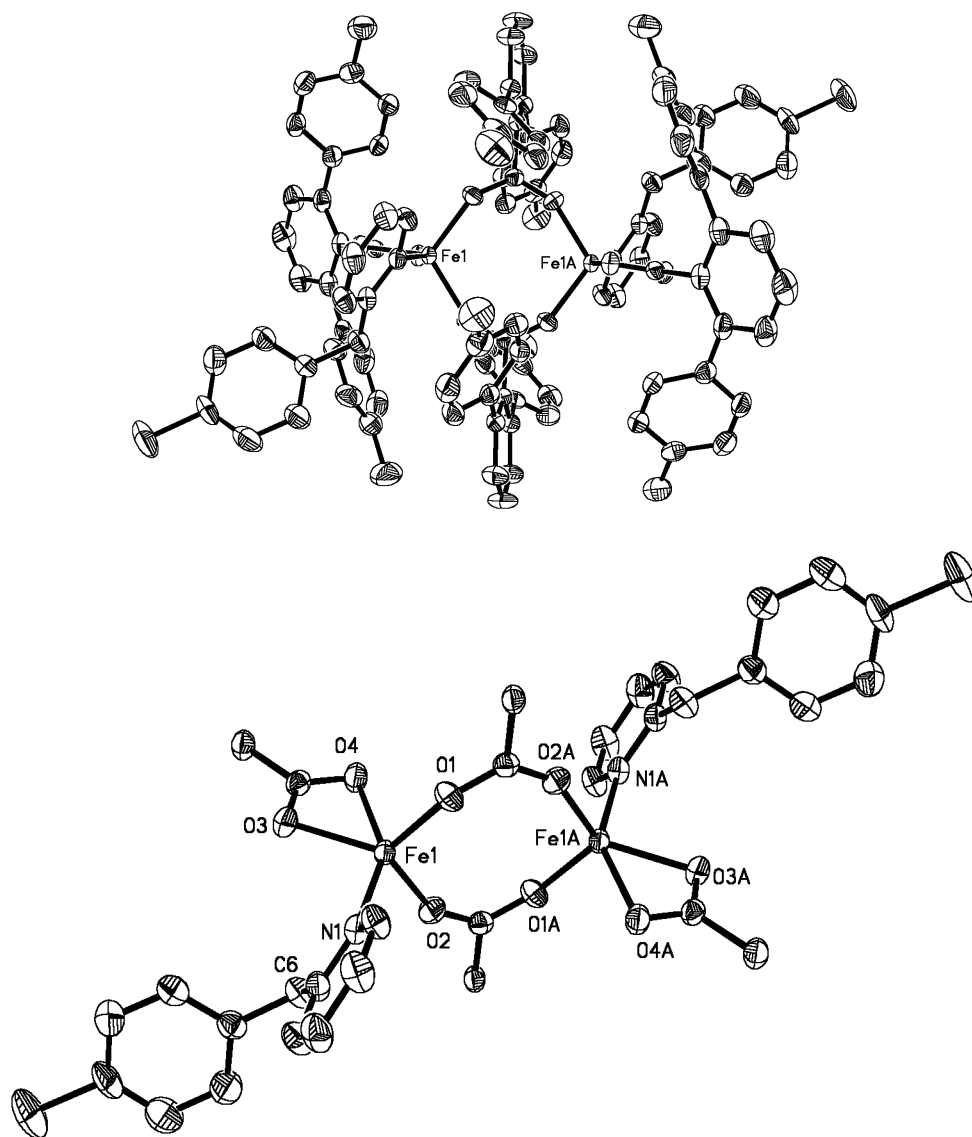

Figure S2. Carson and Lippard

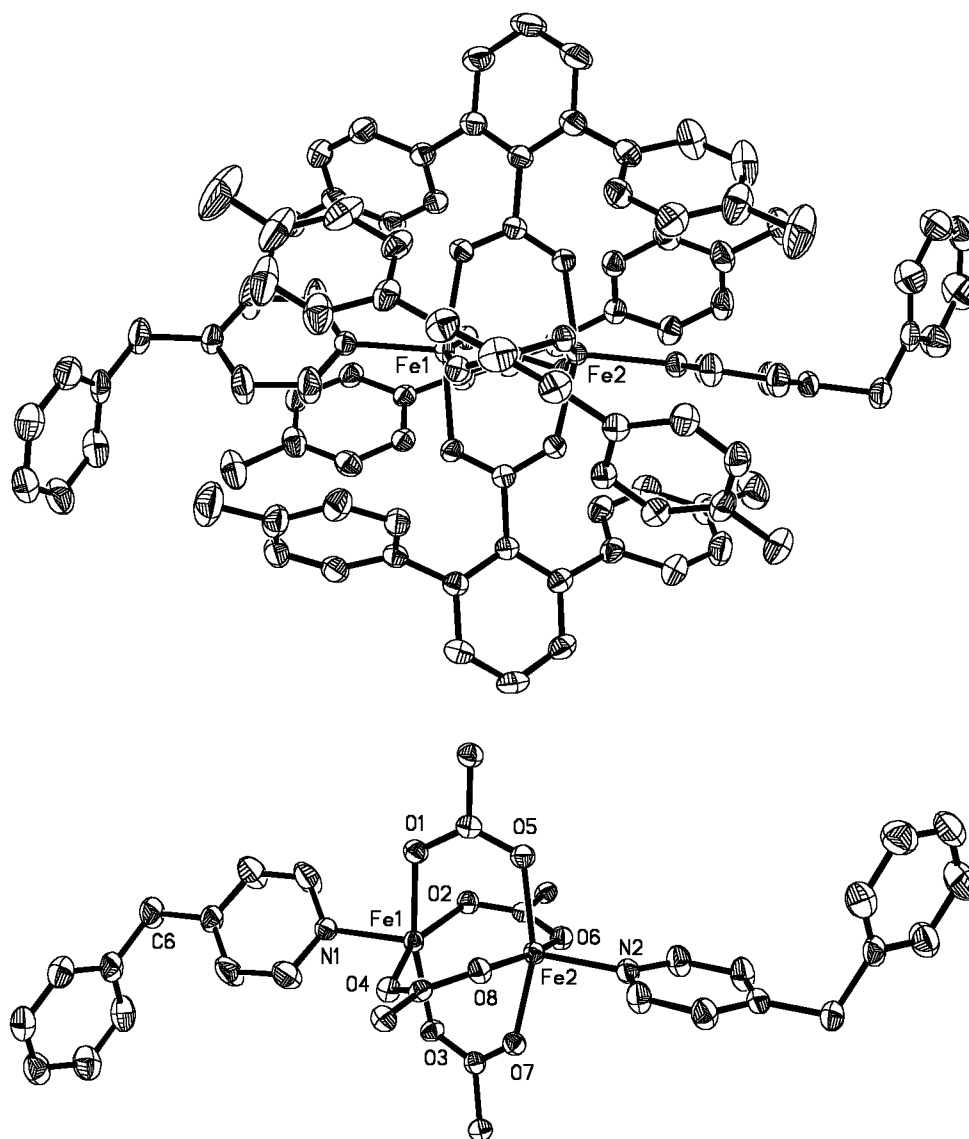

**Figure S3.** Carson and Lippard



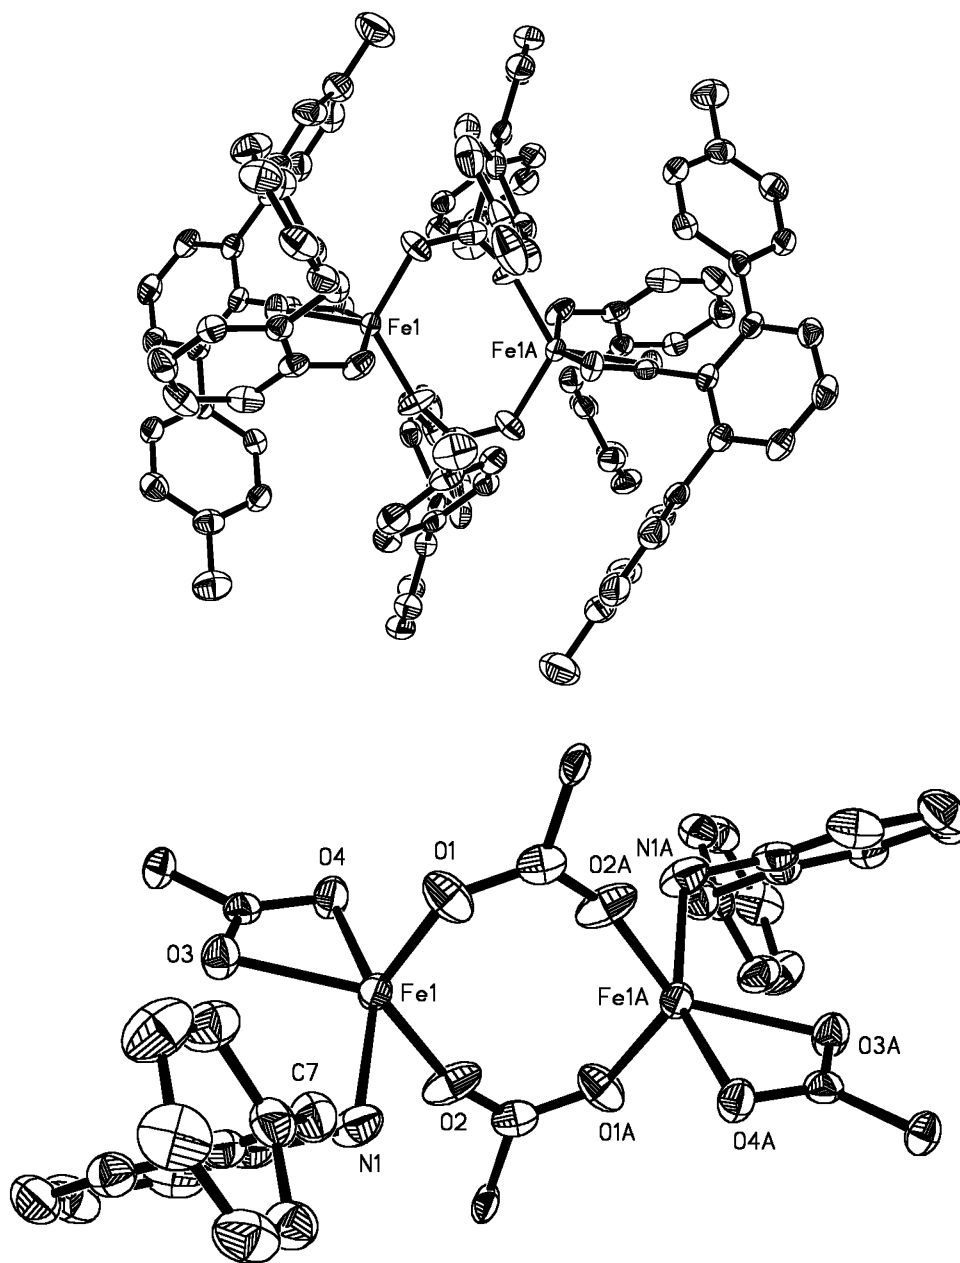

**Figure S4.** Carson and Lippard

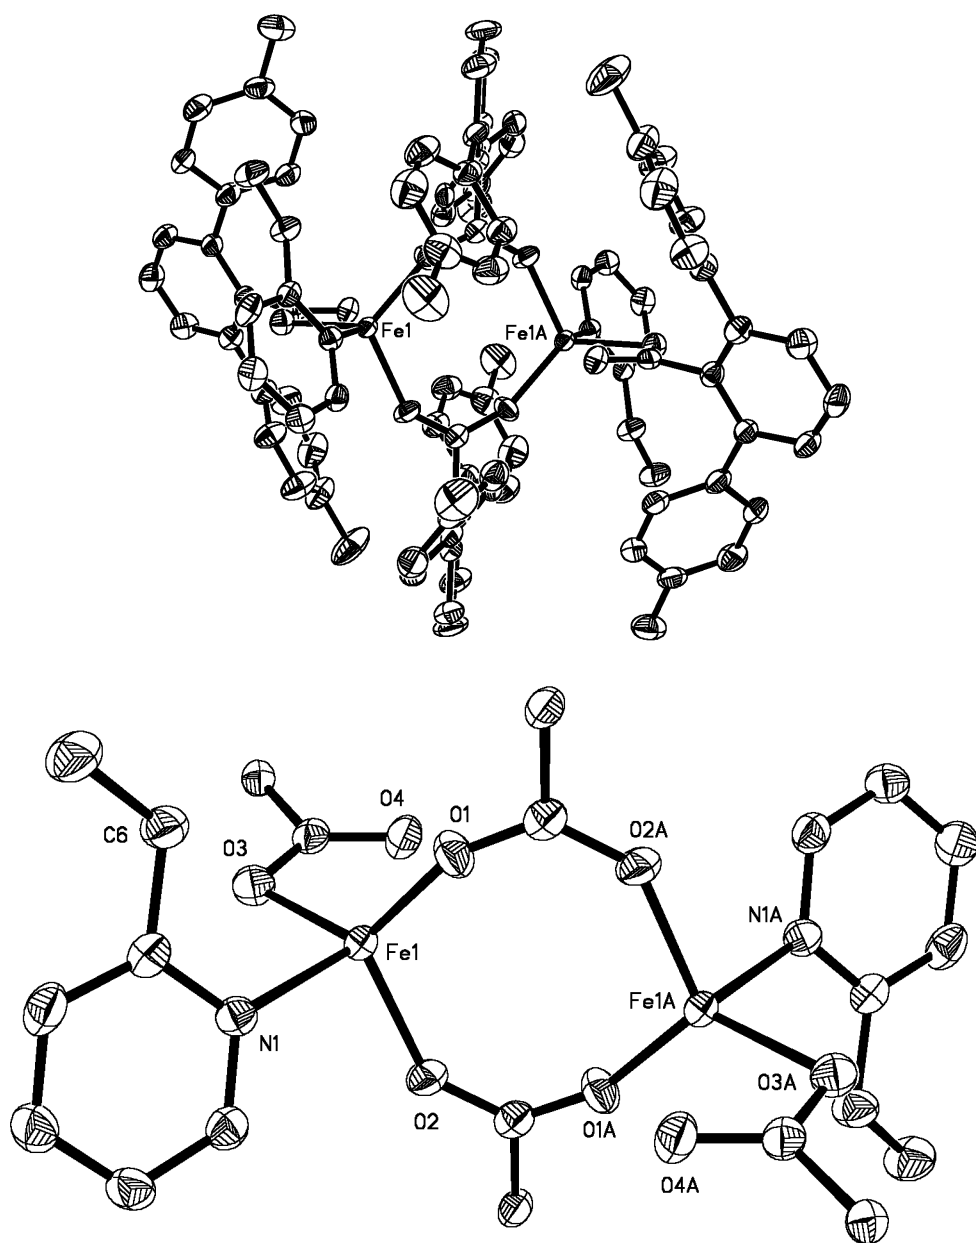

**Figure S5.** Carson and Lippard

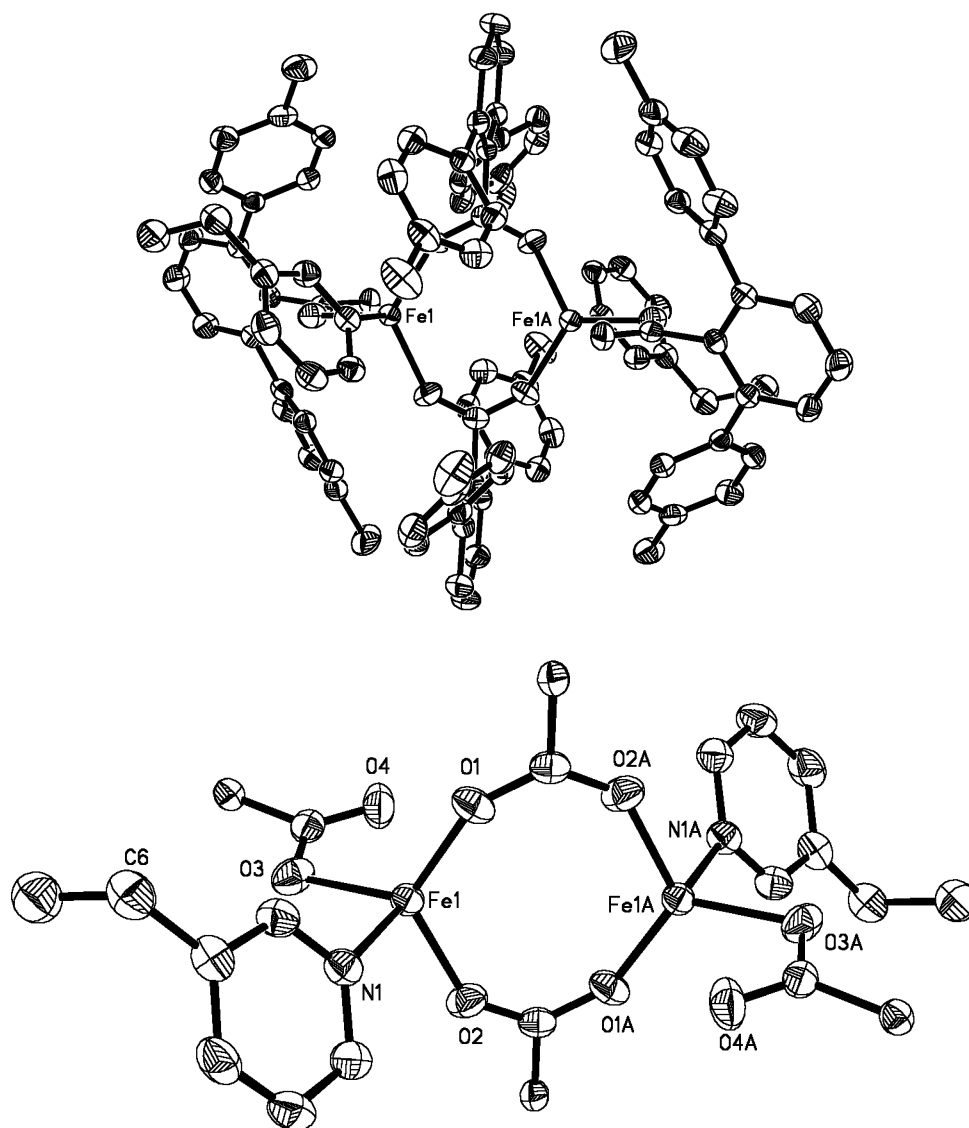

**Figure S6.** Carson and Lippard

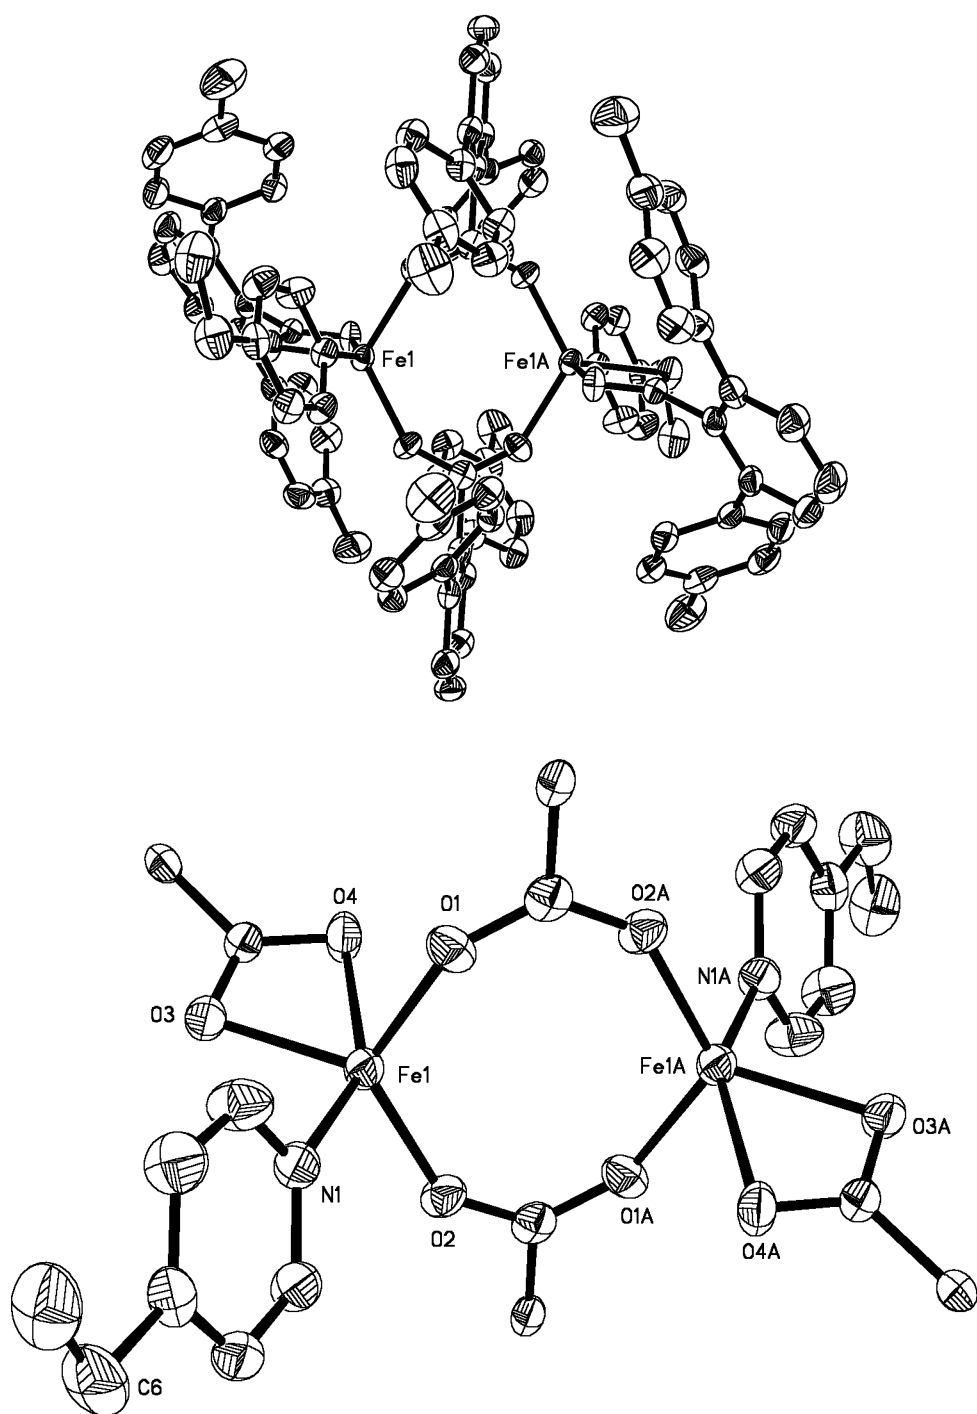

Figure S7. Carson and Lippard

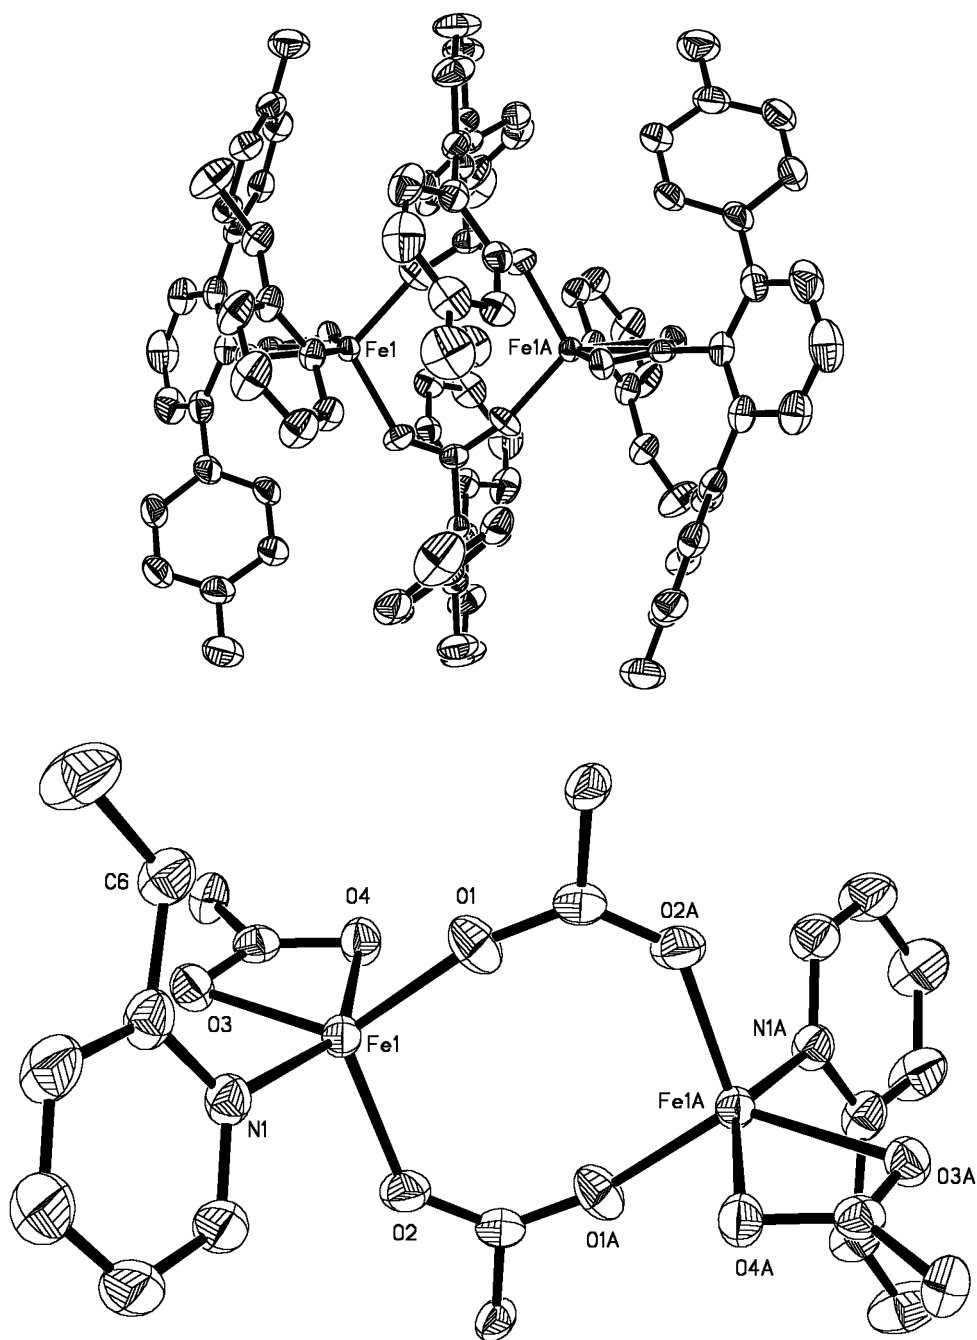

Figure S8. Carson and Lippard

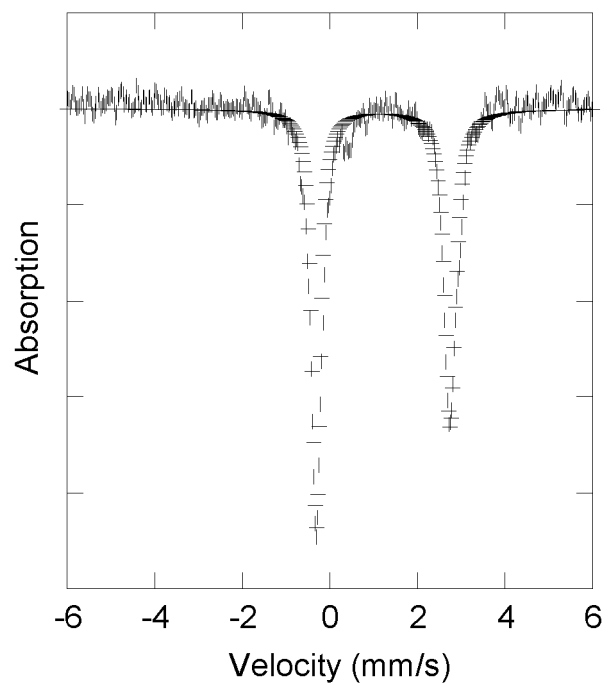

**Figure S9.** Carson and Lippard
